# Supplementary material
Source: PubMed Central journal article supplement (PMC7462023)
Supplement: Supp_FigS2-S3.pdf [file Supp_FigS2-S3.pdf]

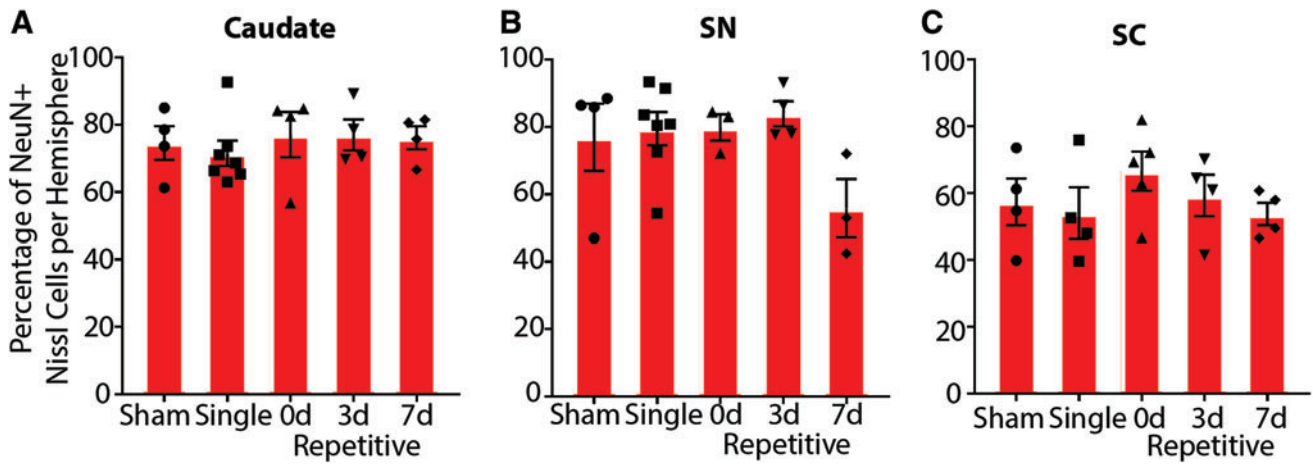

**SUPPLEMENTARY FIG. S2.** General neuron-specific nuclear protein (NeuN) loss 15 min after injury. There is no difference in the total number of NeuN+/Nissl+ cells in the (A) caudate,  $p=0.7232$ ; (B) substantia nigra pars reticulata (SNpr),  $p=0.1188$ ; (C) superior colliculus (SC),  $p=0.5514$ ; or (D) cranial nerve III/IV (CNIII/IV),  $p=0.0561$ ; between sham, single, or repetitively injured animals. Error bars  $\pm$  standard error of the mean.

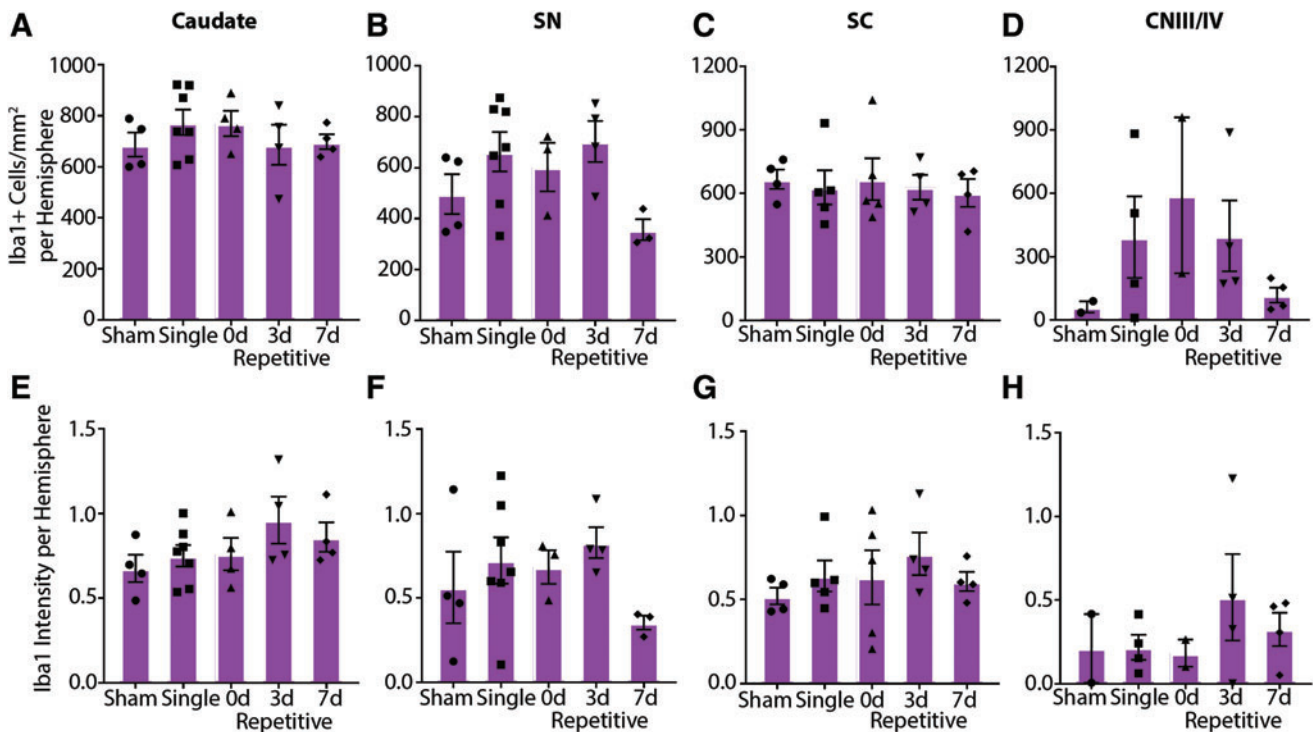

**SUPPLEMENTARY FIG. S3.** Overall microglia reactivity 15 min after injury. There is no difference in the (A-D) density or (E-H) intensity of Iba1+ cells between sham, single, or repetitively injured animals. Caudate (A) density  $p=0.5874$ , (E) intensity  $p=0.3006$ ; substantia nigra pars reticulata (SNpr; B) density  $p=0.0870$ , (F) intensity  $p=0.3208$ ; superior colliculus (SC; C) density  $p=0.9702$ , (G) intensity  $p=0.7666$ ; cranial nerve III/IV (CNIII/IV; D) density  $p=0.1358$ , (H) intensity  $p=0.7929$ . Error bars  $\pm$  standard error of the mean.
